# Supplementary material for: Perovskite Sr0.95Ce0.05CoO3−δ loaded with copper nanoparticles as a bifunctional catalyst for lithium-air batteries
Source: Royal Society of Chemistry journal article supplement (doi:10.1039/c2jm33440b), 2012-01-01
Supplement: c2jm33440b.pdf [file c2jm33440b.pdf]

## Supporting Information Available

### Perovskite-Type $\text{Sr}_{0.95}\text{Ce}_{0.05}\text{CoO}_{3-\delta}$ Loaded with Copper Nanoparticles as a Bifunctional Catalyst for Lithium-Air Batteries

Wei Yang,<sup>a,b</sup> Jason Salim,<sup>c</sup> Shuai Li,<sup>a,b</sup> Chunwen Sun,<sup>\*a,b</sup> Liquan Chen,<sup>a,b</sup>  
John. B. Goodenough,<sup>d</sup> Youngsik Kim,<sup>\*c</sup>

<sup>a</sup> Beijing National Laboratory for Condensed Matter Physics, Institute of Physics, Chinese Academy of Sciences, Beijing 100190, China

<sup>b</sup> Key Laboratory for Renewable Energy, Chinese Academy of Sciences; Beijing Key Laboratory for New Energy Materials and Devices, Beijing 100190, China

<sup>c</sup> Richard G. Lugar Center for Renewable Energy, Department of Mechanical Engineering, Indiana University Purdue University, Indianapolis 46202, United States

<sup>d</sup> Texas Materials Institute, ETC 9.184, University of Texas at Austin, Texas 78712, United States

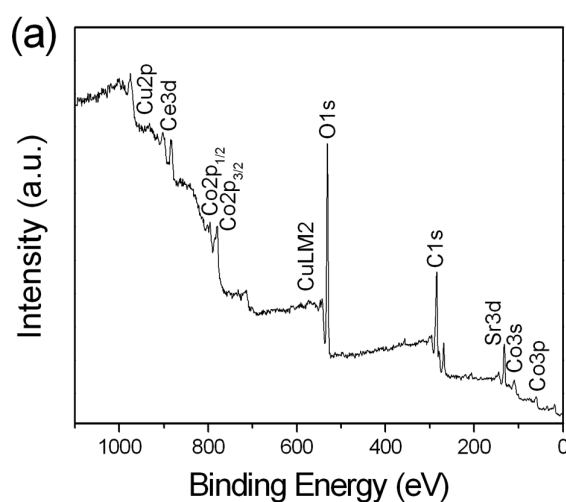

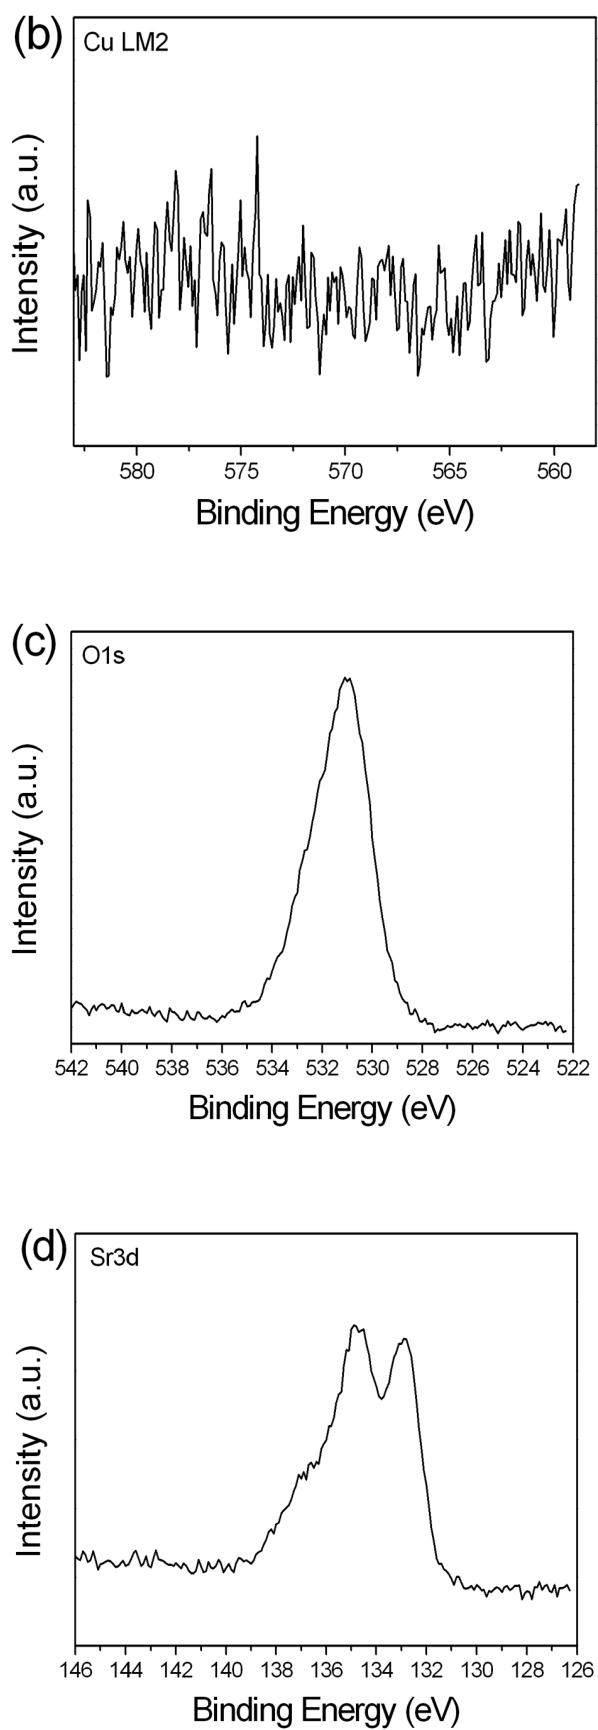

**Fig. S1.** XPS spectra of the  $\text{Sr}_{0.95}\text{Ce}_{0.05}\text{CoO}_{3-\delta}\text{-Cu}$  sample: (a) A typical survey XPS

spectrum, (b) Cu LM2 auger spectrum, (c) O1s spectrum, (d) Sr3d spectrum.

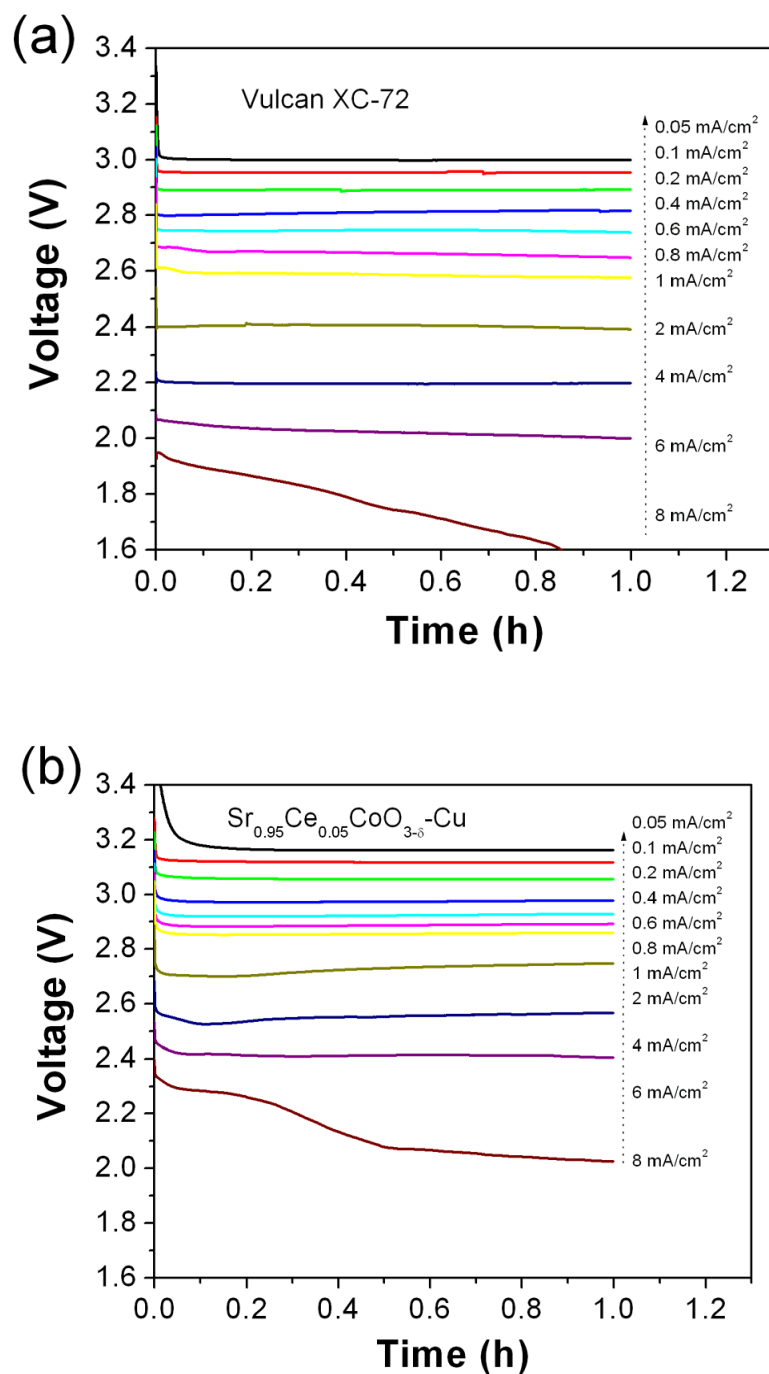

**Fig. S2.** Discharge voltage profiles at different current density of rechargeable lithium-air batteries with hybrid electrolytes: (a) Vulcan XC-72 as the catalyst, and (b) Sr<sub>0.95</sub>Ce<sub>0.05</sub>CoO<sub>3-δ</sub>-Cu as the catalyst.
